# Supplementary material for: Targeted in vivo knock-in of human alpha-1-antitrypsin cDNA using adenoviral delivery of CRISPR/Cas9
Source: PubMed Central journal article supplement (PMC5919923; doi:10.1038/s41434-018-0003-1), 2018-03-27
Supplement: 41434_2018_3_MOESM1_ESM.pdf [file 41434_2018_3_MOESM1_ESM.pdf]

| Primers for Analysis of ROSA26 Gene Editing |                                                                             |                                                                   |                              |
|---------------------------------------------|-----------------------------------------------------------------------------|-------------------------------------------------------------------|------------------------------|
| ID                                          | Primer Binding Target                                                       | Sequence                                                          | PCR Amplicon                 |
| 1                                           | EF1 $\alpha$ promoter (5' end, Reverse Orientation)                         | TTCTCTAGGCACCGGTTCAATTGC                                          | 5' Junction                  |
| 2                                           | <i>EGFP</i> (3' end, Forward Orientation)                                   | GTCCTGCTGGAGTTCGTGACC                                             | 3' Junction                  |
| 3                                           | <i>ROSA26</i> locus (5' end, Forward orientation, outside of homology arms) | CTGATTGGCTTCTTTCTCCC GCC                                          | 5' Junction                  |
| 4                                           | Ad5 genomic location 18452-18472                                            | CGTACGAGGAGGCACTAAAGC                                             | Internal Ad5 Hexon gene      |
| 5                                           | Ad5 genomic location in Hexon gene                                          | CATCATCGAAGGGGTAGCCAT                                             | Internal Ad5 Hexon gene      |
| 6                                           | <i>ROSA26</i> locus (3' end, Reverse orientation, past homology arms)       | GAGTCAAGCCAGTCCAAGAGAAAGC                                         | 3' Junction                  |
| 7                                           | <i>hAAT</i> (3' end, Forward orientation)                                   | CTCCAAGGCCGTGAAGG                                                 | 3' Junction                  |
| 8                                           | <i>ROSA26</i> locus (3' end, Reverse orientation, past homology arms)       | AAGCTCACAAGACCTTAGGTCAGGAAAGAC                                    | 3' Junction                  |
| 9                                           | <i>EGFP</i> (Forward orientation)                                           | GAAGCAGCACGACTTCTTCAAG                                            | <i>EGFP</i> qPCR             |
| 10                                          | <i>EGFP</i> (Reverse orientation)                                           | AAGTCGATGCCCTT CAGCTC                                             | <i>EGFP</i> qPCR             |
| 11                                          | <i>EGFP</i> (Taqman Probe)                                                  | [6FAM]CAAGGACGACGGCAACTACAAGACCCGC[BHQ1]                          | <i>EGFP</i> qPCR             |
| 12                                          | <i>Hexon</i> (Forward orientation)                                          | TACGCACGACGTGACCACA                                               | <i>Hexon</i> qPCR            |
| 13                                          | <i>Hexon</i> (Reverse orientation)                                          | ATCCTCACGGTCCACAGGG                                               | <i>Hexon</i> qPCR            |
| 14                                          | <i>Hexon</i> (Taqman Probe)                                                 | [6FAM]ACCGGTCCCAGCGTTTGACGC[BHQ1]                                 | <i>Hexon</i> qPCR            |
| 15                                          | <i>mActin</i> (Forward orientation)                                         | AGCTGGAGGACTCCGAGACT                                              | <i>mActin</i> qPCR           |
| 16                                          | <i>mActin</i> (Reverse orientation)                                         | TGGCACTTCTCCTGCACCTT                                              | <i>mActin</i> qPCR           |
| 17                                          | <i>mActin</i> (Taqman Probe)                                                | [HEX]TAGACGCCTGCACAAGCCGCC[BHQ1]                                  | <i>mActin</i> qPCR           |
| 18                                          | <i>ROSA26</i> (3' end, reverse orientation)                                 | [Btn]GAGTCAAGCCAGTCCAAGAGAAAGC                                    | LAM-PCR linear amplification |
| 19                                          | Plus Orientation Linker (5' to 3'), anneals                                 | 5'-3' CTGAAGGGCTCAGGTTACACA<br>GGCACGCTCGTAGGAGGTGTTCCAGTTCACCACG | LAM-PCR, Linker              |

|    |                                                                             |                                             |                         |
|----|-----------------------------------------------------------------------------|---------------------------------------------|-------------------------|
|    | negative orientation linker                                                 |                                             |                         |
| 20 | Negative Orientation Linker (3' to 5'), anneals positive orientation linker | 3'-5' [3d_C]CGAGCCTCCACAAGGTCAAGTGGTGC GTAC | LAM-PCR, Linker         |
| 21 | LAM-PCR Linker, Forward orientation                                         | CTGAAGGCTCAGGTTACACAGGCAC                   | LAM-PCR, 1st nested PCR |
| 22 | <i>ROSA26</i> , 3' end reverse orientation (outside of right homology arm)  | AAGCTCACAAGACCTTAGGTCAGGAAAGAC              | LAM-PCR, 1st nested PCR |
| 23 | LAM-PCR Linker, Forward orientation                                         | GCTCGTAGGAGGTGTTCCAGTTCACC                  | LAM-PCR, 2nd nested PCR |
| 24 | <i>ROSA26</i> , 3' end reverse orientation (inside right homology arm)      | GAAGGAGCGGGAGAAATGGATATGAAG                 | LAM-PCR, 2nd nested PCR |
| 25 | <i>ROSA26</i> , 5' end, forward orientation (inside left homology arm)      | GGAGGGTCAGCGAAAGTAGCTC                      | LAM-PCR, Wild-type qPCR |
| 26 | <i>ROSA26</i> , 5' end, reverse orientation (inside left homology arm)      | ATGGACTCAACTTGCACGAACAC                     | LAM-PCR, Wild-type qPCR |
| 27 | <i>ROSA26</i> , 5' end (inside left homology arm)                           | [6FAM]CTTCCTCTGGGGGAGTCGTTTTACCCGCC[BHQ1]   | LAM-PCR, Wild-type qPCR |
