# Supplementary material for: Targeted in vivo knock-in of human alpha-1-antitrypsin cDNA using adenoviral delivery of CRISPR/Cas9
Source: PubMed Central journal article supplement (PMC5919923; doi:10.1038/s41434-018-0003-1), 2018-03-27
Supplement: 41434_2018_3_MOESM2_ESM.pdf [file 41434_2018_3_MOESM2_ESM.pdf]

## Supplemental Table 2A

| I.D. | Treatment     | Dose                        | Total Reads | #1-Indel (W/T) | #1-Reads(%) | #2-Indel | #2-Reads(%) | #3-Indel | #3-Reads(%) | #4-Indel | #4-Reads(%) | #5-Indel | #5-Reads(%) | #6-Indel | #6-Reads(%) | #7-Indel | #7-Reads(%) | #8-Indel | #8-Reads(%) |
|------|---------------|-----------------------------|-------------|----------------|-------------|----------|-------------|----------|-------------|----------|-------------|----------|-------------|----------|-------------|----------|-------------|----------|-------------|
| 1    | PBS           | 0 VP/Cell                   | 238         | 0              | 237 (99.6%) | -1       | 1 (0.4%)    | NA       | NA          | NA       | NA          | NA       | NA          | NA       | NA          | NA       | NA          | NA       | NA          |
| 2    | PBS           | 0 VP/Cell                   | 388         | 0              | 387 (99.7%) | -3       | 1 (0.3%)    | NA       | NA          | NA       | NA          | NA       | NA          | NA       | NA          | NA       | NA          | NA       | NA          |
| 3    | Ad5-Cas9-gRNA | 1 x 10 <sup>3</sup> VP/cell | 318         | 0              | 309 (97.2%) | -1       | 5 (1.6%)    | -15      | 2 (0.6%)    | -118     | 1 (0.3%)    | -68      | 1 (0.3%)    | NA       | NA          | NA       | NA          | NA       | NA          |
| 4    | Ad5-Cas9-gRNA | 1 x 10 <sup>3</sup> VP/cell | 453         | 0              | 438 (96.7%) | -1       | 6 (1.3%)    | -3       | 2 (0.4%)    | -19      | 1 (0.2%)    | -17      | 1 (0.2%)    | -15      | 1 (0.2%)    | -2       | 1 (0.2%)    | -41      | 1 (0.2%)    |
| 5    | Ad5-Cas9-gRNA | 2 x 10 <sup>3</sup> VP/cell | 362         | 0              | 343 (94.8%) | -15      | 3 (0.8%)    | -125     | 2 (0.6%)    | -14      | 2 (0.6%)    | -3       | 2 (0.6%)    | -1       | 2 (0.6%)    | -28      | 1 (0.3%)    | -91      | 1 (0.3%)    |
| 6    | Ad5-Cas9-gRNA | 2 x 10 <sup>3</sup> VP/cell | 339         | 0              | 322 (95.0%) | -15      | 4 (1.2%)    | -1       | 3 (0.9%)    | -2       | 2 (0.6%)    | -3       | 2 (0.6%)    | -112     | 1 (0.3%)    | -54      | 1 (0.3%)    | -16      | 1 (0.3%)    |
| 7    | Ad5-Cas9-gRNA | 4 x 10 <sup>3</sup> VP/cell | 439         | 0              | 417 (95.0%) | -15      | 5 (1.1%)    | -1       | 4 (0.9%)    | -74      | 3 (0.7%)    | -2       | 3 (0.7%)    | -12      | 2 (0.5%)    | -95      | 1 (0.2%)    | -27      | 1 (0.2%)    |
| 8    | Ad5-Cas9-gRNA | 4 x 10 <sup>3</sup> VP/cell | 537         | 0              | 480 (89.4%) | -15      | 16 (3.0%)   | -1       | 8 (1.5%)    | -2       | 4 (0.7%)    | -19      | 3 (0.6%)    | -108     | 2 (0.4%)    | -80      | 2 (0.4%)    | -43      | 2 (0.4%)    |
| 9    | Ad5-Cas9-gRNA | 6 x 10 <sup>3</sup> VP/cell | 361         | 0              | 301 (83.4%) | -15      | 16 (4.4%)   | -1       | 11 (3.0%)   | -2       | 5 (1.4%)    | -3       | 4 (1.1%)    | -80      | 2 (0.6%)    | -79      | 2 (0.6%)    | -19      | 2 (0.6%)    |
| 10   | Ad5-Cas9-gRNA | 6 x 10 <sup>3</sup> VP/cell | 281         | 0              | 226 (80.4%) | -15      | 12 (4.3%)   | -1       | 9 (3.2%)    | -2       | 4 (1.4%)    | -3       | 3 (1.1%)    | 1        | 2 (0.7%)    | -79      | 2 (0.7%)    | -43      | 2 (0.7%)    |
| 11   | Ad5-Cas9-gRNA | 8 x 10 <sup>3</sup> VP/cell | 501         | 0              | 390 (77.8%) | -1       | 24 (4.8%)   | -15      | 16 (3.2%)   | -2       | 10 (2.0%)   | -3       | 8 (1.6%)    | 1        | 7 (1.4%)    | -26      | 4 (0.8%)    | -95      | 3 (0.6%)    |
| 12   | Ad5-Cas9-gRNA | 8 x 10 <sup>3</sup> VP/cell | 388         | 0              | 310 (79.9%) | -15      | 13 (3.4%)   | -1       | 12 (3.1%)   | 1        | 4 (1.0%)    | -116     | 3 (0.8%)    | -114     | 3 (0.8%)    | -16      | 3 (0.8%)    | -2       | 3 (0.8%)    |
| 13   | Ad5-Cas9-gRNA | 1 x 10 <sup>3</sup> VP/cell | 350         | 0              | 255 (72.9%) | -15      | 17 (4.9%)   | -2       | 14 (4.0%)   | -1       | 12 (3.4%)   | 1        | 6 (1.7%)    | -3       | 5 (1.4%)    | -19      | 4 (1.1%)    | -66      | 3 (0.9%)    |
| 14   | Ad5-Cas9-gRNA | 1 x 10 <sup>3</sup> VP/cell | 211         | 0              | 156 (73.9%) | -15      | 9 (4.3%)    | -1       | 9 (4.3%)    | -3       | 6 (2.8%)    | 1        | 3 (1.4%)    | -2       | 3 (1.4%)    | -80      | 2 (0.9%)    | -23      | 2 (0.9%)    |
| 15   | Ad5-Cas9-gRNA | 2 x 10 <sup>4</sup> VP/cell | 346         | 0              | 184 (53.2%) | -1       | 35 (10.1%)  | -15      | 22 (6.4%)   | -2       | 15 (4.3%)   | -3       | 9 (2.6%)    | -19      | 5 (1.4%)    | -79      | 4 (1.2%)    | 1        | 3 (0.9%)    |
| 16   | Ad5-Cas9-gRNA | 2 x 10 <sup>4</sup> VP/cell | 462         | 0              | 271 (58.7%) | -1       | 35 (7.6%)   | -15      | 32 (6.9%)   | -2       | 24 (5.2%)   | -3       | 17 (3.7%)   | -35      | 5 (1.1%)    | -19      | 5 (1.1%)    | -22      | 4 (0.9%)    |

## Supplemental Table 2B

| I.D. | Treatment                     | Dose                                  | Total Reads | #1-Indel (W/T) | #1-Reads(%)  | #2-Indel | #2-Reads(%) | #3-Indel | #3-Reads(%) | #4-Indel | #4-Reads(%) | #5-Indel | #5-Reads(%) | #6-Indel | #6-Reads(%) | #7-Indel | #7-Reads(%) | #8-Indel | #8-Reads(%) |
|------|-------------------------------|---------------------------------------|-------------|----------------|--------------|----------|-------------|----------|-------------|----------|-------------|----------|-------------|----------|-------------|----------|-------------|----------|-------------|
| 2    | PBS                           | 0 VP                                  | 578         | 0              | 567 (98.1%)  | -1       | 10 (1.7%)   | -2       | 1 (0.2%)    | NA       | NA          | NA       | NA          | NA       | NA          | NA       | NA          | NA       | NA          |
| 3    | Ad5-EF1α-eGFP + Ad5-gRNA      | 5 x 10 <sup>10</sup> VP (each vector) | 3629        | 0              | 3556 (98.0%) | -1       | 63 (1.7%)   | -2       | 9 (0.2%)    | 1        | 1 (0.0%)    | NA       | NA          | NA       | NA          | NA       | NA          | NA       | NA          |
| 4    | Ad5-EF1α-eGFP + Ad5-gRNA      | 5 x 10 <sup>10</sup> VP (each vector) | 3486        | 0              | 3422 (98.2%) | -1       | 52 (1.5%)   | 46       | 6 (0.2%)    | -2       | 3 (0.1%)    | 1        | 2 (0.1%)    | 2        | 1 (0.0%)    | NA       | NA          | NA       | NA          |
| 5    | Ad5-EF1α-eGFP + Ad5-gRNA      | 5 x 10 <sup>10</sup> VP (each vector) | 4269        | 0              | 4169 (97.7%) | -1       | 89 (2.1%)   | -2       | 7 (0.2%)    | 1        | 4 (0.1%)    | NA       | NA          | NA       | NA          | NA       | NA          | NA       | NA          |
| 6    | Ad5-EF1α-eGFP + Ad5-gRNA      | 5 x 10 <sup>10</sup> VP (each vector) | 539         | 0              | 526 (97.6%)  | -1       | 12 (2.2%)   | -2       | 1 (0.2%)    | NA       | NA          | NA       | NA          | NA       | NA          | NA       | NA          | NA       | NA          |
| 7    | Ad5-EF1α-eGFP + Ad5-Cas9-gRNA | 5 x 10 <sup>10</sup> VP (each vector) | 3649        | 0              | 3473 (95.2%) | -1       | 88 (2.4%)   | 46       | 21 (0.6%)   | -2       | 20 (0.5%)   | 1        | 12 (0.3%)   | -15      | 3 (0.1%)    | -3       | 3 (0.1%)    | 2        | 2 (0.1%)    |
| 9    | Ad5-EF1α-eGFP + Ad5-Cas9-gRNA | 5 x 10 <sup>10</sup> VP (each vector) | 3460        | 0              | 3273 (94.6%) | -1       | 88 (2.5%)   | 1        | 17 (0.5%)   | -2       | 16 (0.5%)   | -3       | 8 (0.2%)    | -19      | 4 (0.1%)    | -15      | 4 (0.1%)    | -120     | 3 (0.1%)    |
| 10   | Ad5-EF1α-eGFP + Ad5-Cas9-gRNA | 5 x 10 <sup>10</sup> VP (each vector) | 3249        | 0              | 3091 (95.1%) | -1       | 75 (2.3%)   | -2       | 20 (0.6%)   | -3       | 15 (0.5%)   | 1        | 9 (0.3%)    | -15      | 5 (0.2%)    | -34      | 3 (0.1%)    | -11      | 2 (0.1%)    |
| 11   | Ad5-EF1α-eGFP + Ad5-Cas9-gRNA | 5 x 10 <sup>10</sup> VP (each vector) | 5431        | 0              | 5212 (96.0%) | -1       | 122 (2.2%)  | -2       | 27 (0.5%)   | 1        | 14 (0.3%)   | -3       | 6 (0.1%)    | -15      | 4 (0.1%)    | -103     | 3 (0.1%)    | -66      | 3 (0.1%)    |
| 12   | Ad5-EF1α-eGFP + Ad5-Cas9-gRNA | 5 x 10 <sup>10</sup> VP (each vector) | 3649        | 0              | 3471 (95.1%) | -1       | 86 (2.4%)   | -2       | 30 (0.8%)   | -3       | 9 (0.2%)    | 1        | 8 (0.2%)    | -15      | 6 (0.2%)    | -4       | 5 (0.1%)    | -5       | 3 (0.1%)    |
| 13   | Ad5-EF1α-eGFP + Ad5-Cas9-gRNA | 5 x 10 <sup>10</sup> VP (each vector) | 4509        | 0              | 4095 (90.8%) | -1       | 138 (3.1%)  | -2       | 47 (1.0%)   | 1        | 35 (0.8%)   | -15      | 23 (0.5%)   | -3       | 23 (0.5%)   | -4       | 10 (0.2%)   | 2        | 9 (0.2%)    |
| 14   | Ad5-EF1α-eGFP + Ad5-Cas9-gRNA | 5 x 10 <sup>10</sup> VP (each vector) | 1026        | 0              | 919 (89.6%)  | -1       | 43 (4.2%)   | 1        | 9 (0.9%)    | -15      | 9 (0.9%)    | -2       | 9 (0.9%)    | -3       | 7 (0.7%)    | -18      | 4 (0.4%)    | -27      | 3 (0.3%)    |
| 15   | Ad5-EF1α-eGFP + Ad5-Cas9-gRNA | 5 x 10 <sup>10</sup> VP (each vector) | 3515        | 0              | 3349 (95.3%) | -1       | 84 (2.4%)   | -2       | 16 (0.5%)   | 1        | 10 (0.3%)   | -15      | 7 (0.2%)    | -4       | 4 (0.1%)    | -3       | 4 (0.1%)    | 46       | 3 (0.1%)    |
